# Supplementary material for: Facile synthesis of graft copolymers of controlled architecture. Copolymerization of fluorinated and non-fluorinated poly(dimethylsiloxane) macromonomers with trialkylsilyl methacrylates using RAFT polymerization
Source: Royal Society of Chemistry journal article supplement (doi:10.1039/c6py00026f), 2016-01-01
Supplement: c6py00026f1.pdf [file c6py00026f1.pdf]

## Supporting Information

# **Facile Synthesis of Graft Copolymers of Controlled Architecture. Copolymerization of Fluorinated and Non-Fluorinated Poly(dimethylsiloxane) Macromonomers with Trialkylsilyl Methacrylates using RAFT Polymerization**

*Dražen Pavlović,<sup>\*†</sup> Sandra Lafond, André Margailan and Christine Bressy\**

*Université de Toulon, Laboratoire MAPIEM, EA 4323, 83957 La Garde, France*

### **Table of Content**

#### **Spectral, TD-SEC and kinetics data for compounds in the Experimental Section**

|                                                                                                                                                                                                                                                                                     |           |
|-------------------------------------------------------------------------------------------------------------------------------------------------------------------------------------------------------------------------------------------------------------------------------------|-----------|
| <b>Figure 1.</b> <sup>1</sup> H NMR spectrum of PDMSMA <sub>symm</sub> Macro RAFT agent in CDCl <sub>3</sub>                                                                                                                                                                        | <b>S3</b> |
| <b>Figure 2.</b> <sup>1</sup> H NMR spectrum of PDMSMA <sub>fluor symm</sub> Macro RAFT agent in CDCl <sub>3</sub>                                                                                                                                                                  | <b>S4</b> |
| <b>Figure 3.</b> <sup>1</sup> H NMR spectrum of p(PDMSMA <sub>symm</sub> )-b-p(TBDMSMA) in CDCl <sub>3</sub>                                                                                                                                                                        | <b>S5</b> |
| <b>Figure 4.</b> <sup>1</sup> H NMR spectrum of p(PDMSMA <sub>fluor symm</sub> )-b-p(TBDMSMA) in CDCl <sub>3</sub>                                                                                                                                                                  | <b>S6</b> |
| <b>Figure 5.</b> <sup>1</sup> H NMR spectrum of p(PDMSMA <sub>symm</sub> )-b-p(TIPSMA) in CDCl <sub>3</sub>                                                                                                                                                                         | <b>S7</b> |
| <b>Figure 6.</b> <sup>1</sup> H NMR spectrum of p(PDMSMA <sub>fluor symm</sub> )-b-p(TIPSMA) in CDCl <sub>3</sub>                                                                                                                                                                   | <b>S8</b> |
| <b>Figure 7. (a)</b> TD-SEC traces of PDMS <sub>symm</sub> macro RAFT agent and p(PDMSMA <sub>symm</sub> )-b-p(TBDMSMA) block copolymer. <b>(b)</b> TD-SEC traces of PDMS <sub>fluor symm</sub> macro RAFT agent and p(PDMSMA <sub>fluor symm</sub> )-b-p(TBDMSMA) block copolymer. | <b>S9</b> |

\* Corresponding authors: Christine Bressy (E-mail: [christine.bressy@univ-tln.fr](mailto:christine.bressy@univ-tln.fr)) and Dražen Pavlović ([dpavlovic@hotmail.fr](mailto:dpavlovic@hotmail.fr)).

<sup>†</sup> Current address: Siget 18c, 10000 Zagreb, Croatia.

**Figure S8.** (a) Plots of  $\ln([M_0]/[M])/[A]_0^{1/2}$  versus polymerization time for TBDMSMA and TIPSMA polymerization in toluene at 70°C. (b) Plots of  $\ln([M_0]/[M])/[A]_0^{1/2}$  versus polymerization time for symmetrical PDMSMA, and fluorinated symmetrical PDMSMA polymerization in toluene at 70°C. **S10**

**Figure S9.** (a) Plot of monomer conversion versus time for RAFT copolymerization of TBDMSMA and symmetrical PDMSMA macromonomer (PDMSMA<sub>symm</sub>), in the presence of CPDB at 70°C in toluene. (b) Plot of monomer conversion *versus* time for RAFT copolymerization of TBDMSMA and symmetrical fluorinated PDMSMA macromonomer (PDMSMA<sub>fluor symm</sub>), in the presence of CPDB at 70°C in toluene. **S11**

**Figure S10.** TD-SEC traces of statistical copolymers obtained by CPDB-mediated RAFT copolymerization of TBDMSMA and either PDMSMA<sub>symm</sub> or PDMSMA<sub>fluor symm</sub> macromonomers at 70°C in toluene. (a) p(PDMSMA<sub>symm</sub>-stat-TBDMSMA) (b) p(PDMSMA<sub>fluor symm</sub>-stat-TBDMSMA). **S11**

**Figure S11.** (a) Plot of monomer conversion *versus* time for RAFT copolymerization of TIPSMA and symmetrical PDMSMA macromonomer (PDMSMA<sub>symm</sub>), in the presence of CPDB at 70°C in toluene. (b) Plot of monomer conversion *versus* time for RAFT copolymerization of TIPSMA and symmetrical fluorinated PDMSMA macromonomer (PDMSMA<sub>fluor symm</sub>), in the presence of CPDB at 70°C in toluene. **S12**

**Figure S12.** Evolution of the number-average molar mass  $M_n$  and dispersity  $D_M$  with monomer conversion in the statistical copolymerization of TIPSMA and either PDMSMA<sub>symm</sub> (a) or PDMSMA<sub>fluor symm</sub> (b) at 70°C mediated by CPDB. **S12**

**Figure S13.** Jaacks plot for the RAFT polymerization of TBDMSMA and PDMSMA<sub>symm</sub> (a), and PDMSMA<sub>fluor symm</sub> (b) in toluene at 70°C. **S13**

**Figure S14.** Jaacks plot for the RAFT polymerization of TIPSMA and PDMSMA<sub>symm</sub> (a), and PDMSMA<sub>fluor symm</sub> (b) in toluene at 70°C. **S13**

**Figure S15.** Evolution of the mass with immersion time in artificial seawater. (a) Coatings composed of statistical graft copolymers, (b) coatings composed of diblock graft copolymers. **S13**

**References** **S14**

Figure 1.  $^1\text{H}$  NMR spectrum of PDMSMA<sub>asymm</sub> Macro RAFT agent in  $\text{CDCl}_3$ 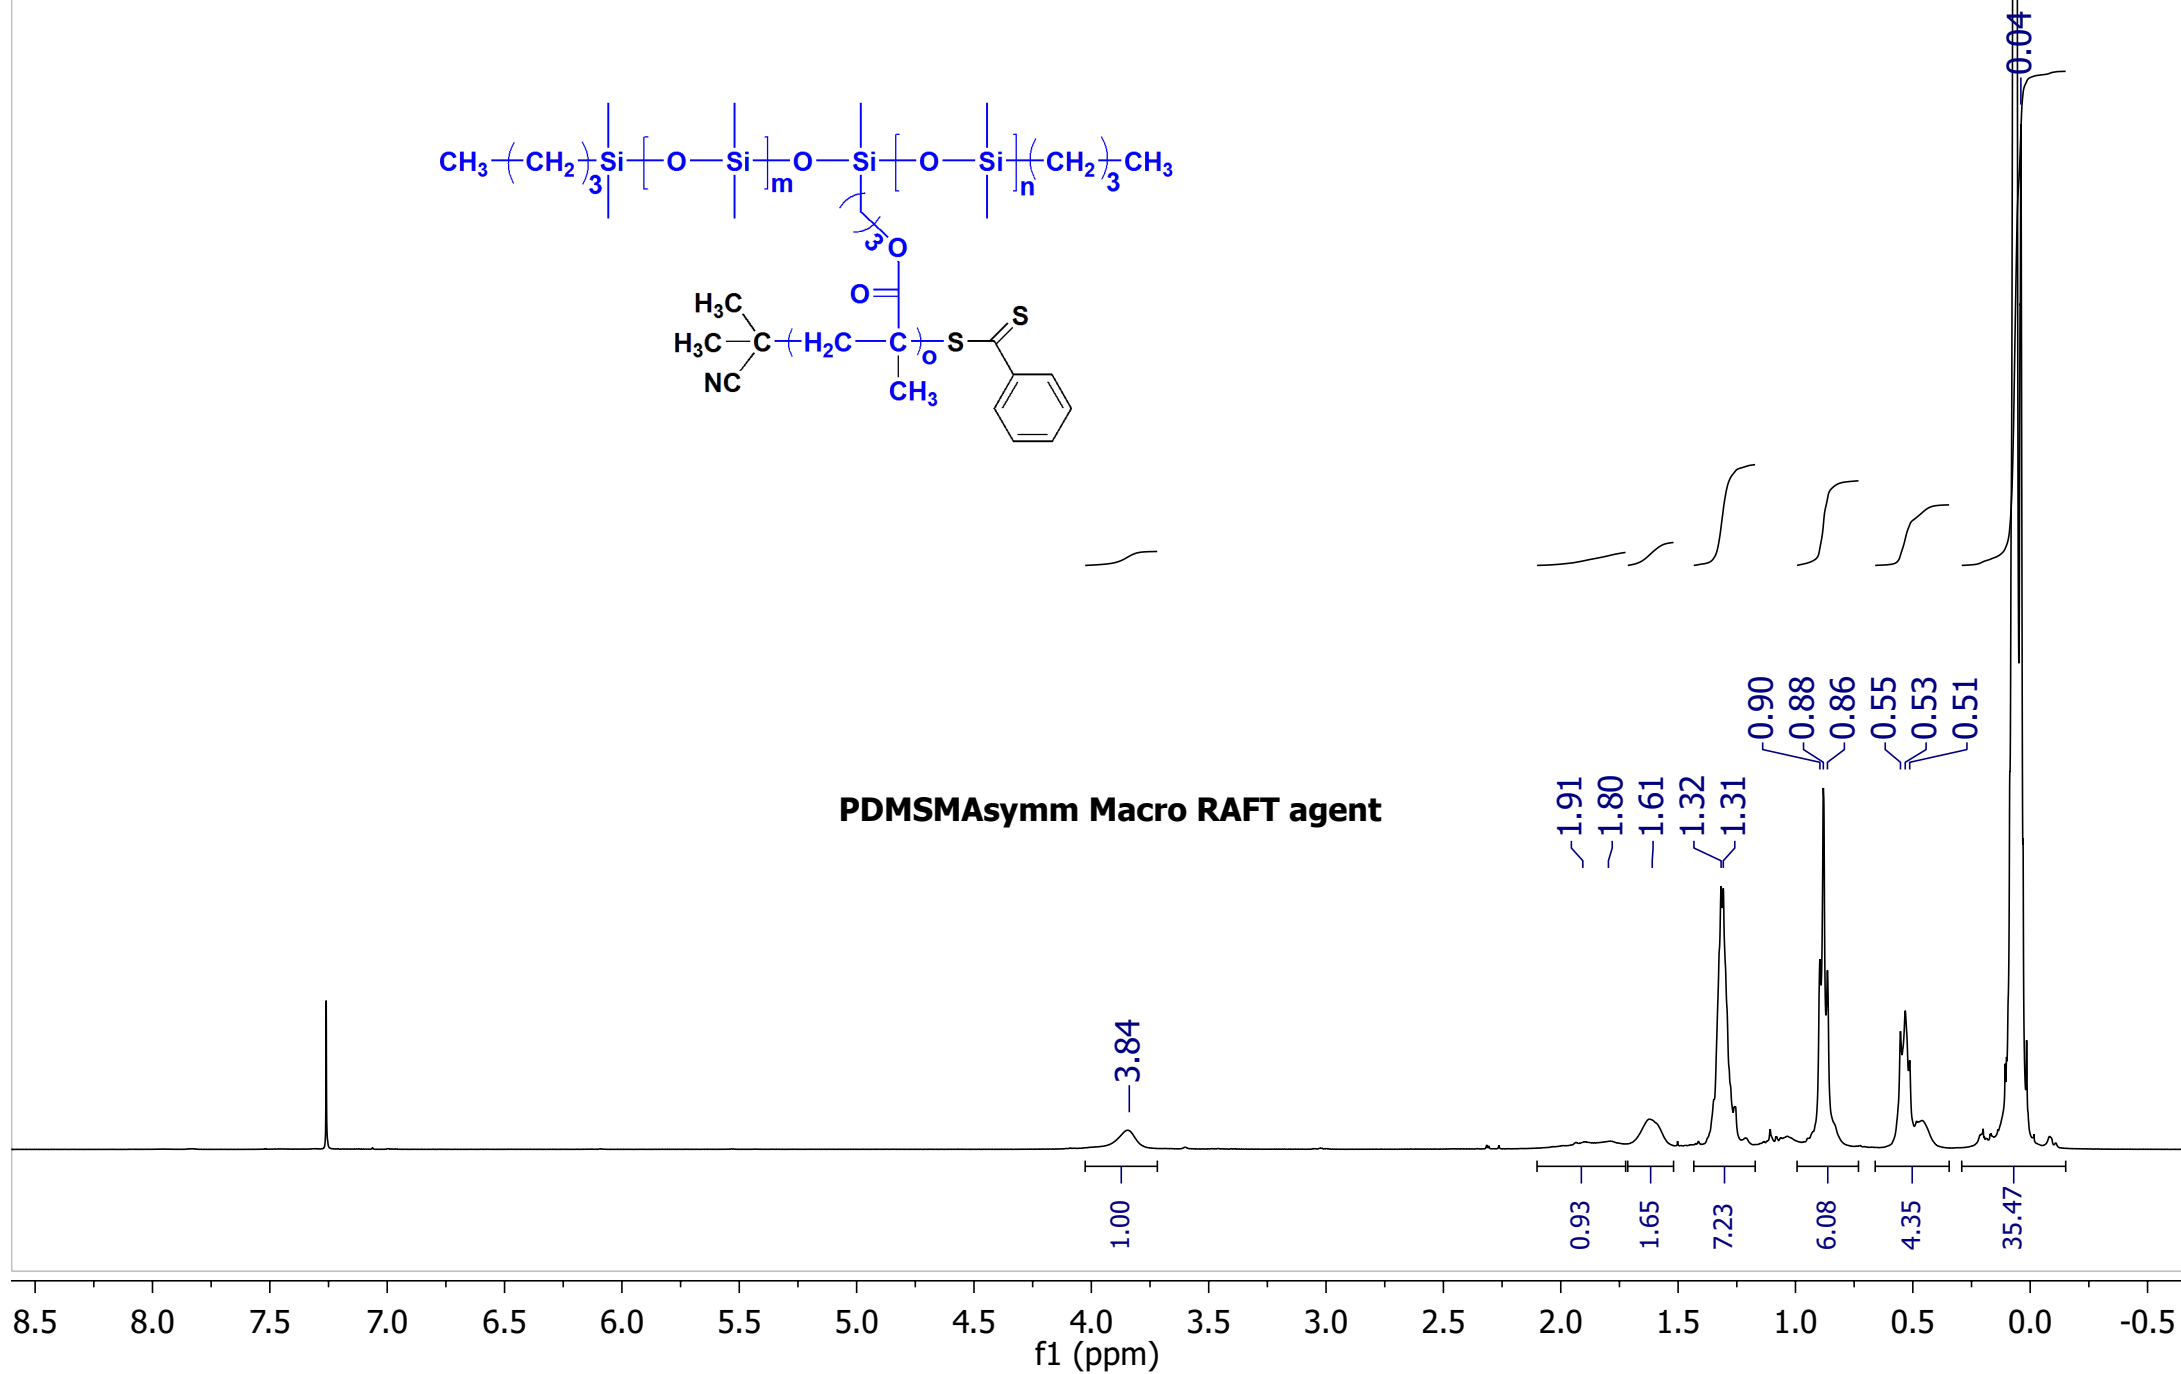

Figure 2.  $^1\text{H}$  NMR spectrum of PDMSMAfluor symm Macro RAFT agent in  $\text{CDCl}_3$ 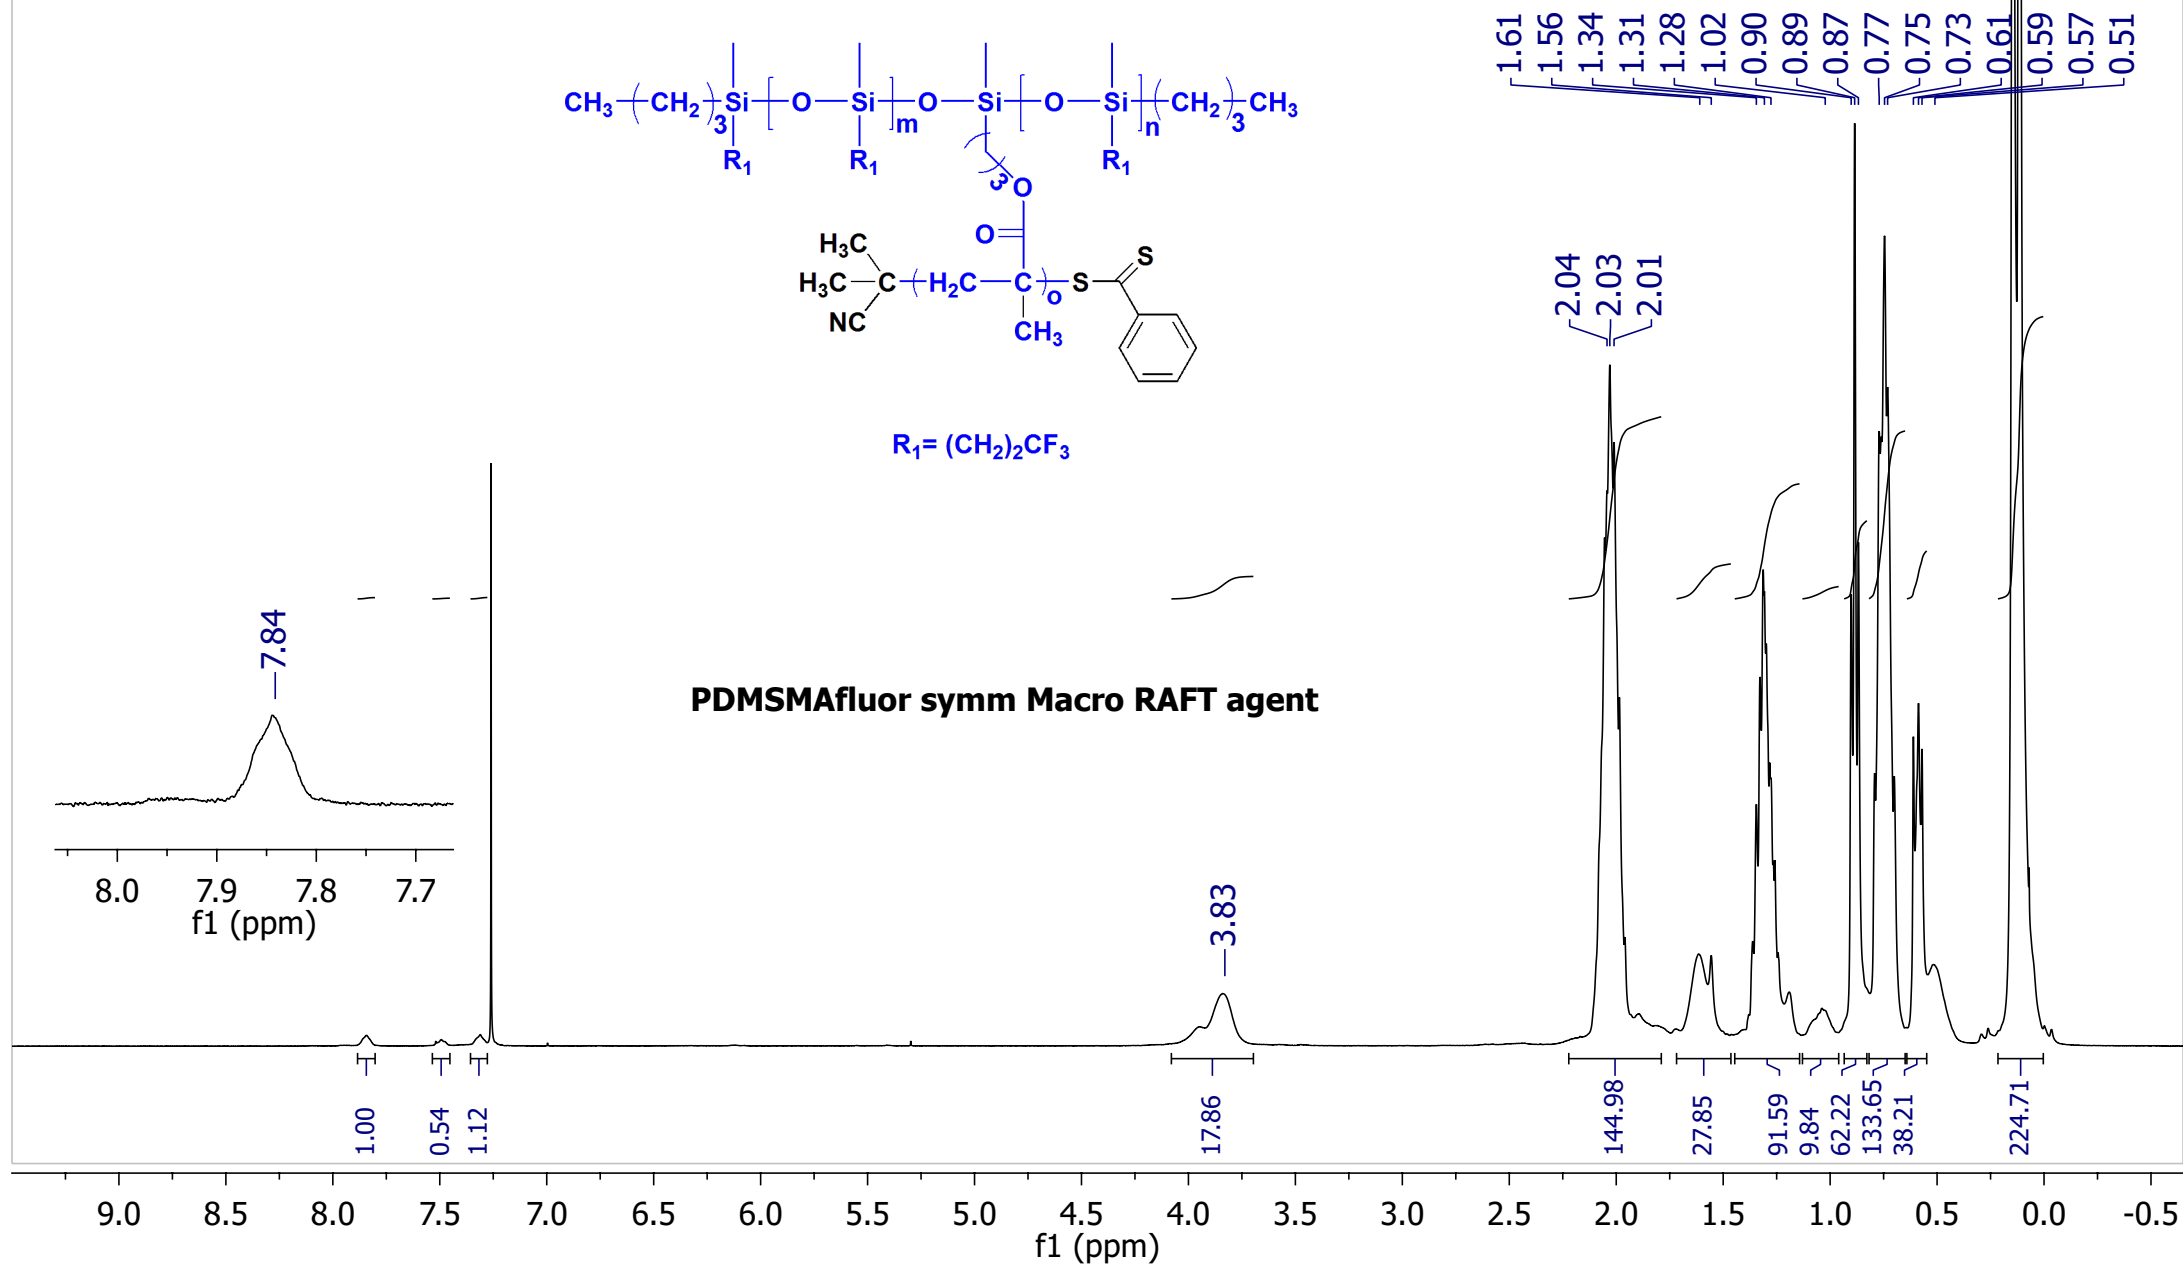

Figure 3.  $^1\text{H}$  NMR spectrum of p(PDMSMA<sub>symm</sub>)-b-p(TBDMSMA) in  $\text{CDCl}_3$

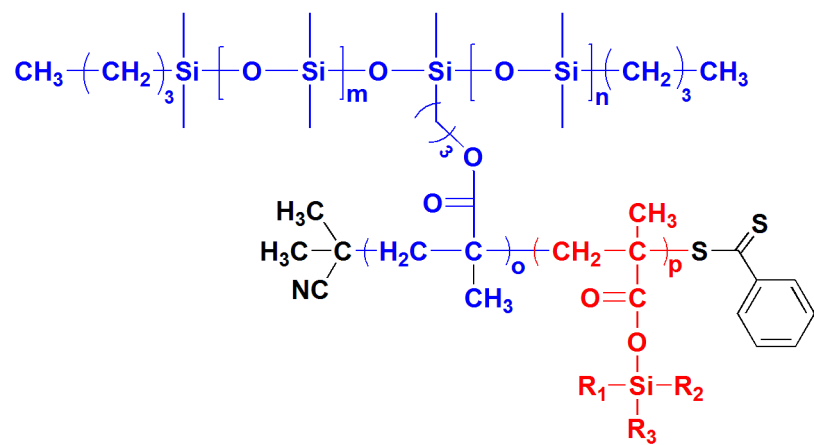

$\text{R}_1 = \text{R}_2 = \text{Me}$ ;  $\text{R}_3 = \text{t-Bu}$  TBDMSMA

p(PDMSMA<sub>symm</sub>)-b-p(TBDMSMA)

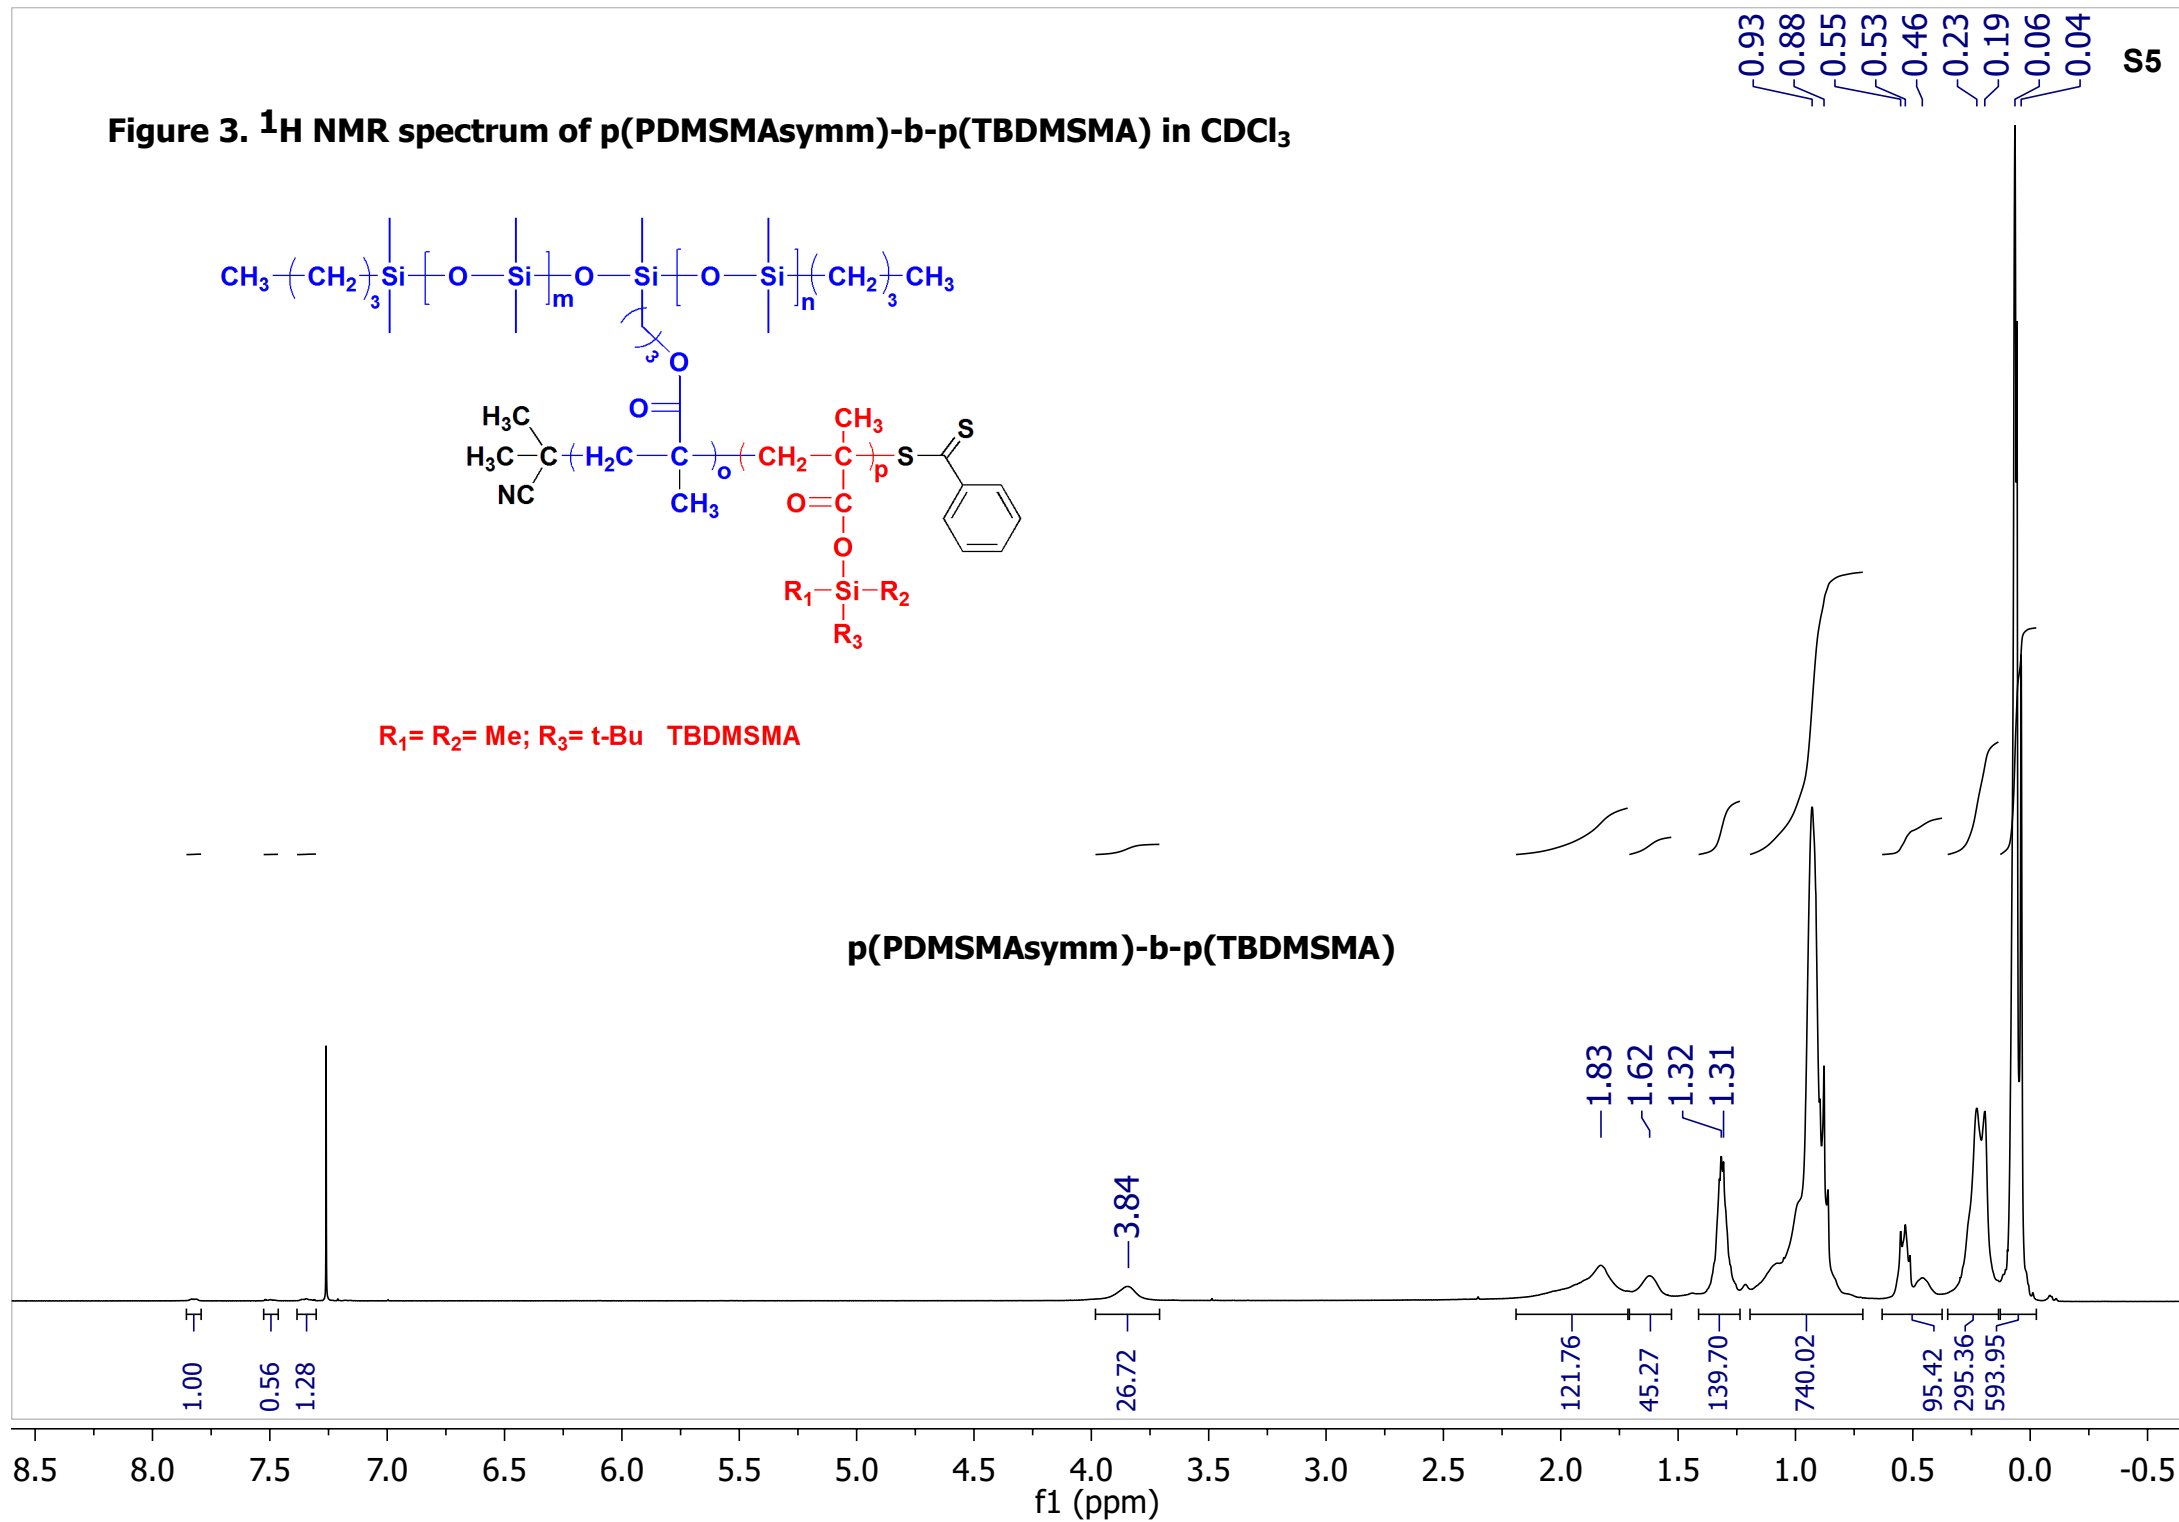

Figure 4.  $^1\text{H}$  NMR spectrum of p(PDMSMAfluor symm)-b-p(TBDMSMA) in  $\text{CDCl}_3$

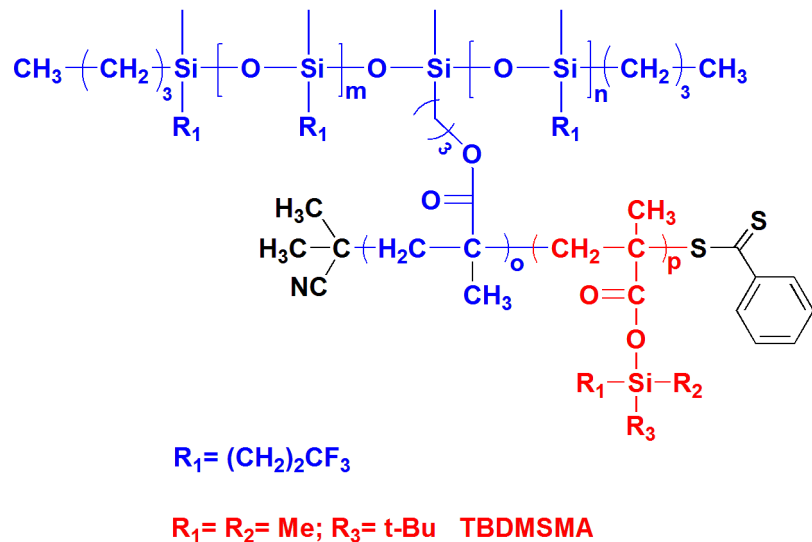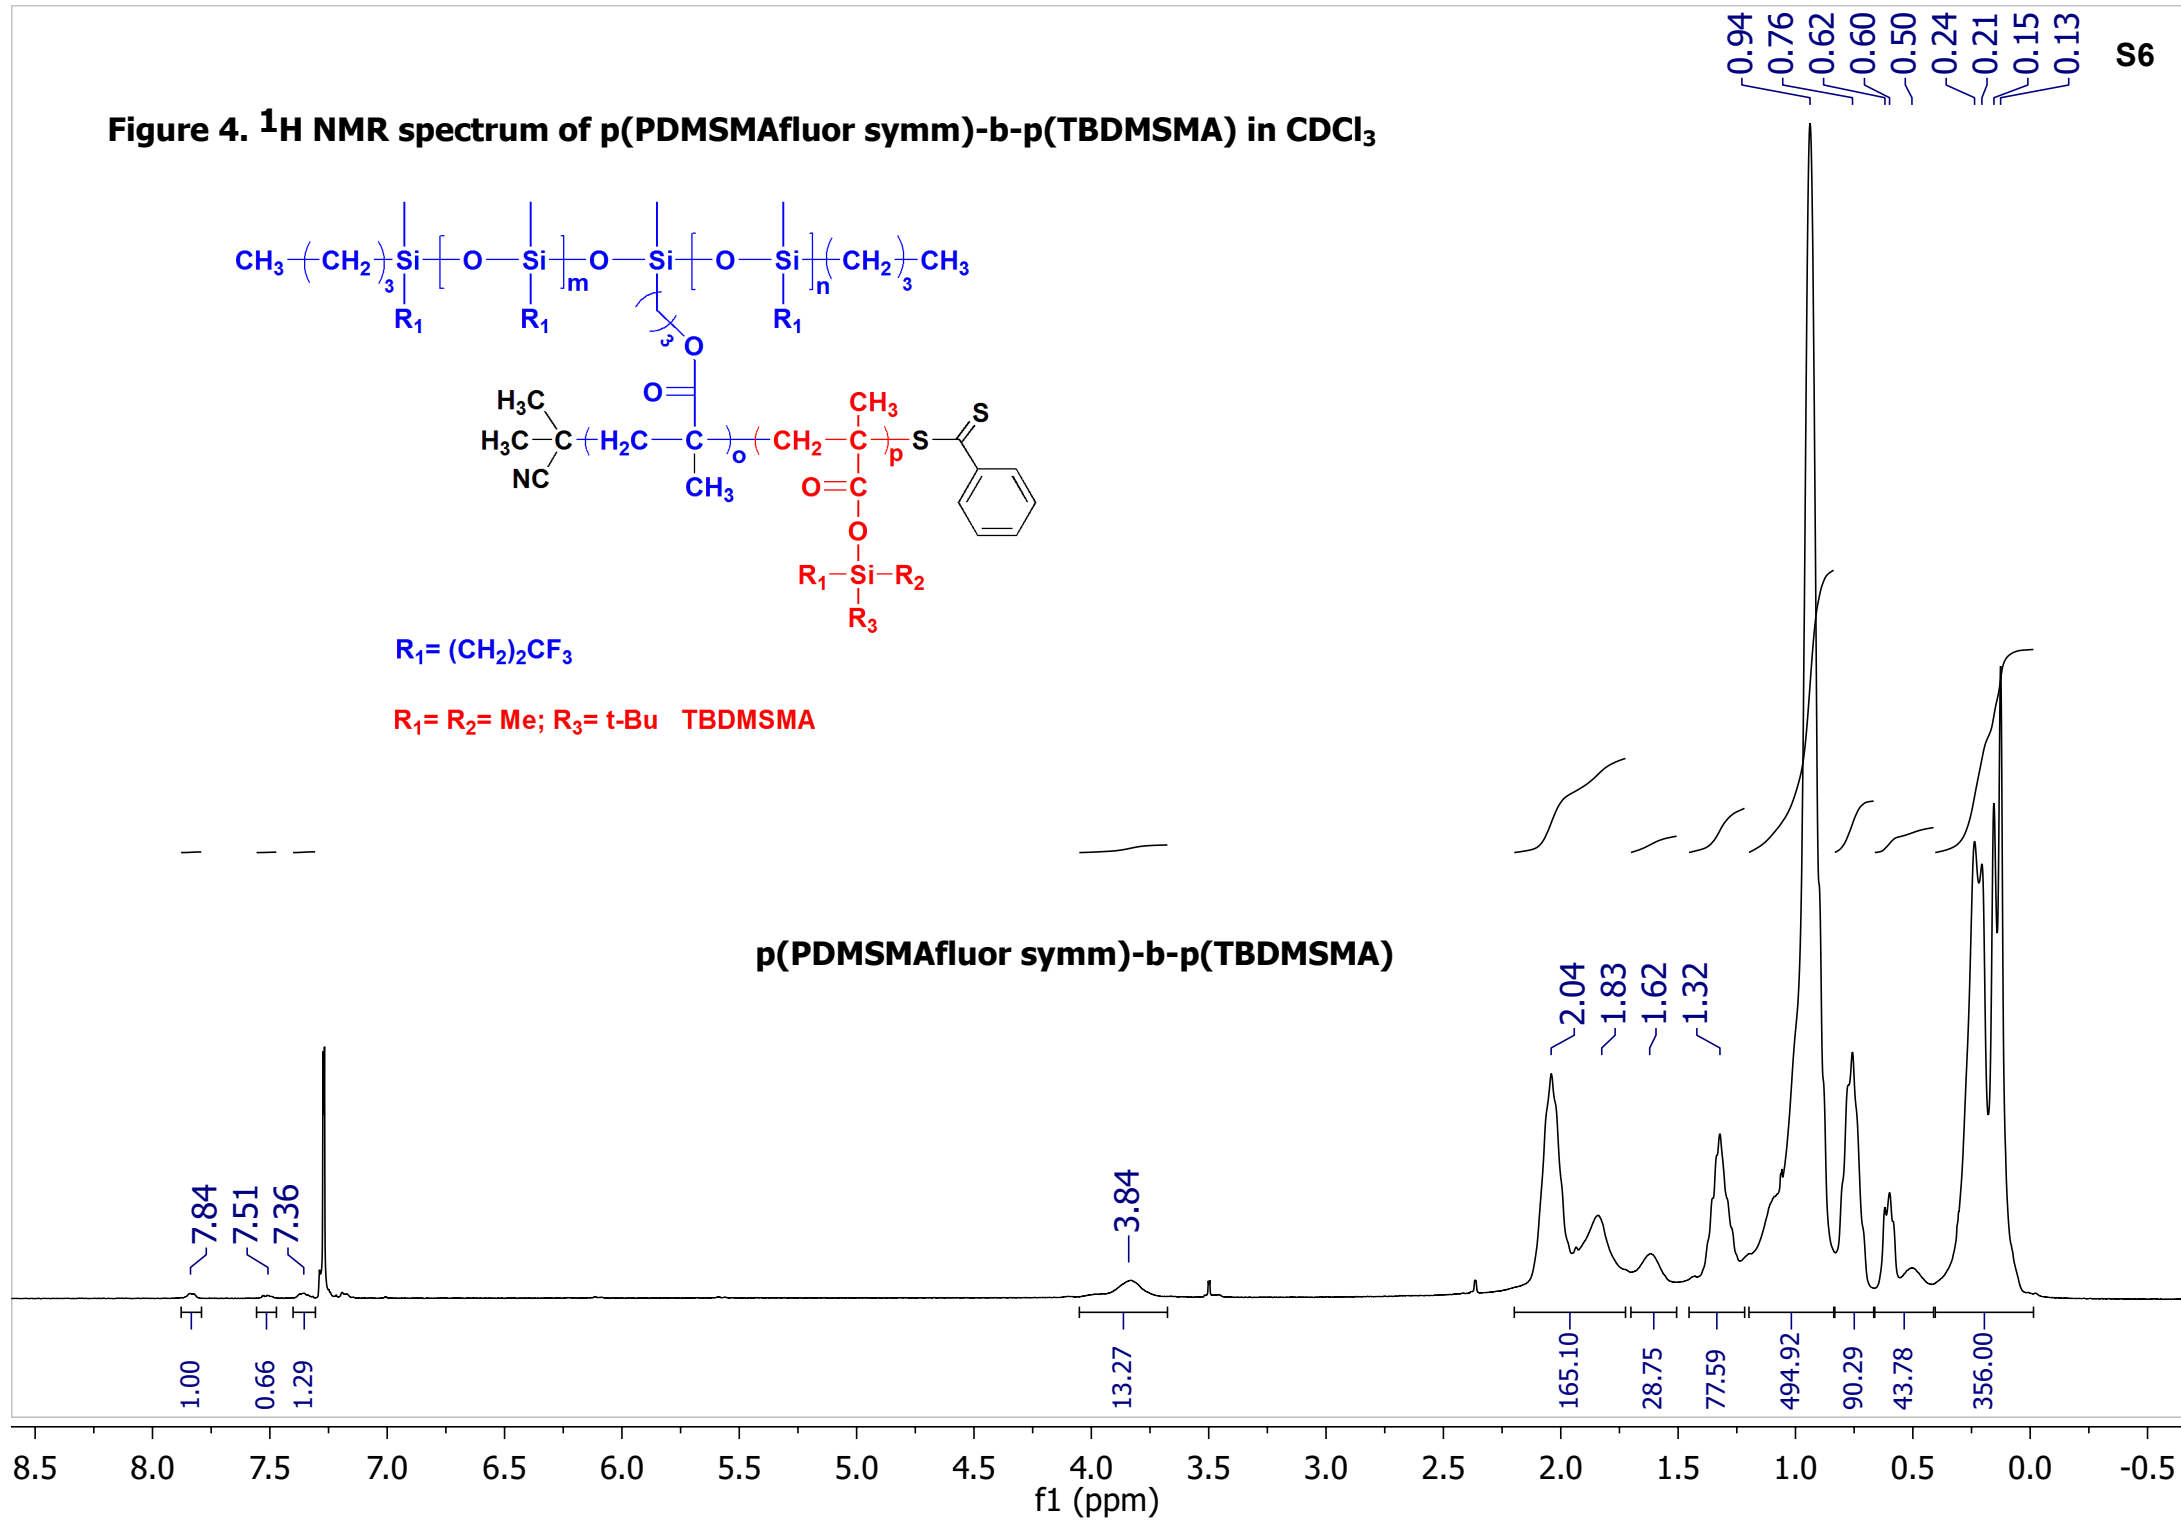

Figure 5. <sup>1</sup>H NMR spectrum of p(PDMSMA<sub>symm</sub>)-b-p(TIPSMA) in CDCl<sub>3</sub>

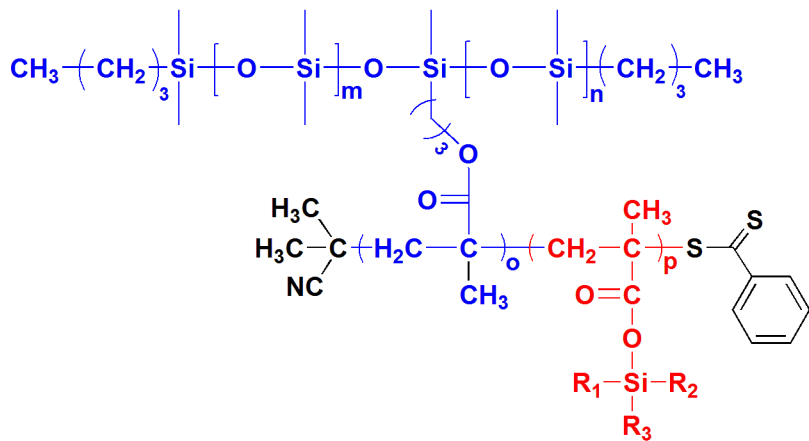

R<sub>1</sub> = R<sub>2</sub> = R<sub>3</sub> = i-Pr TIPSMA

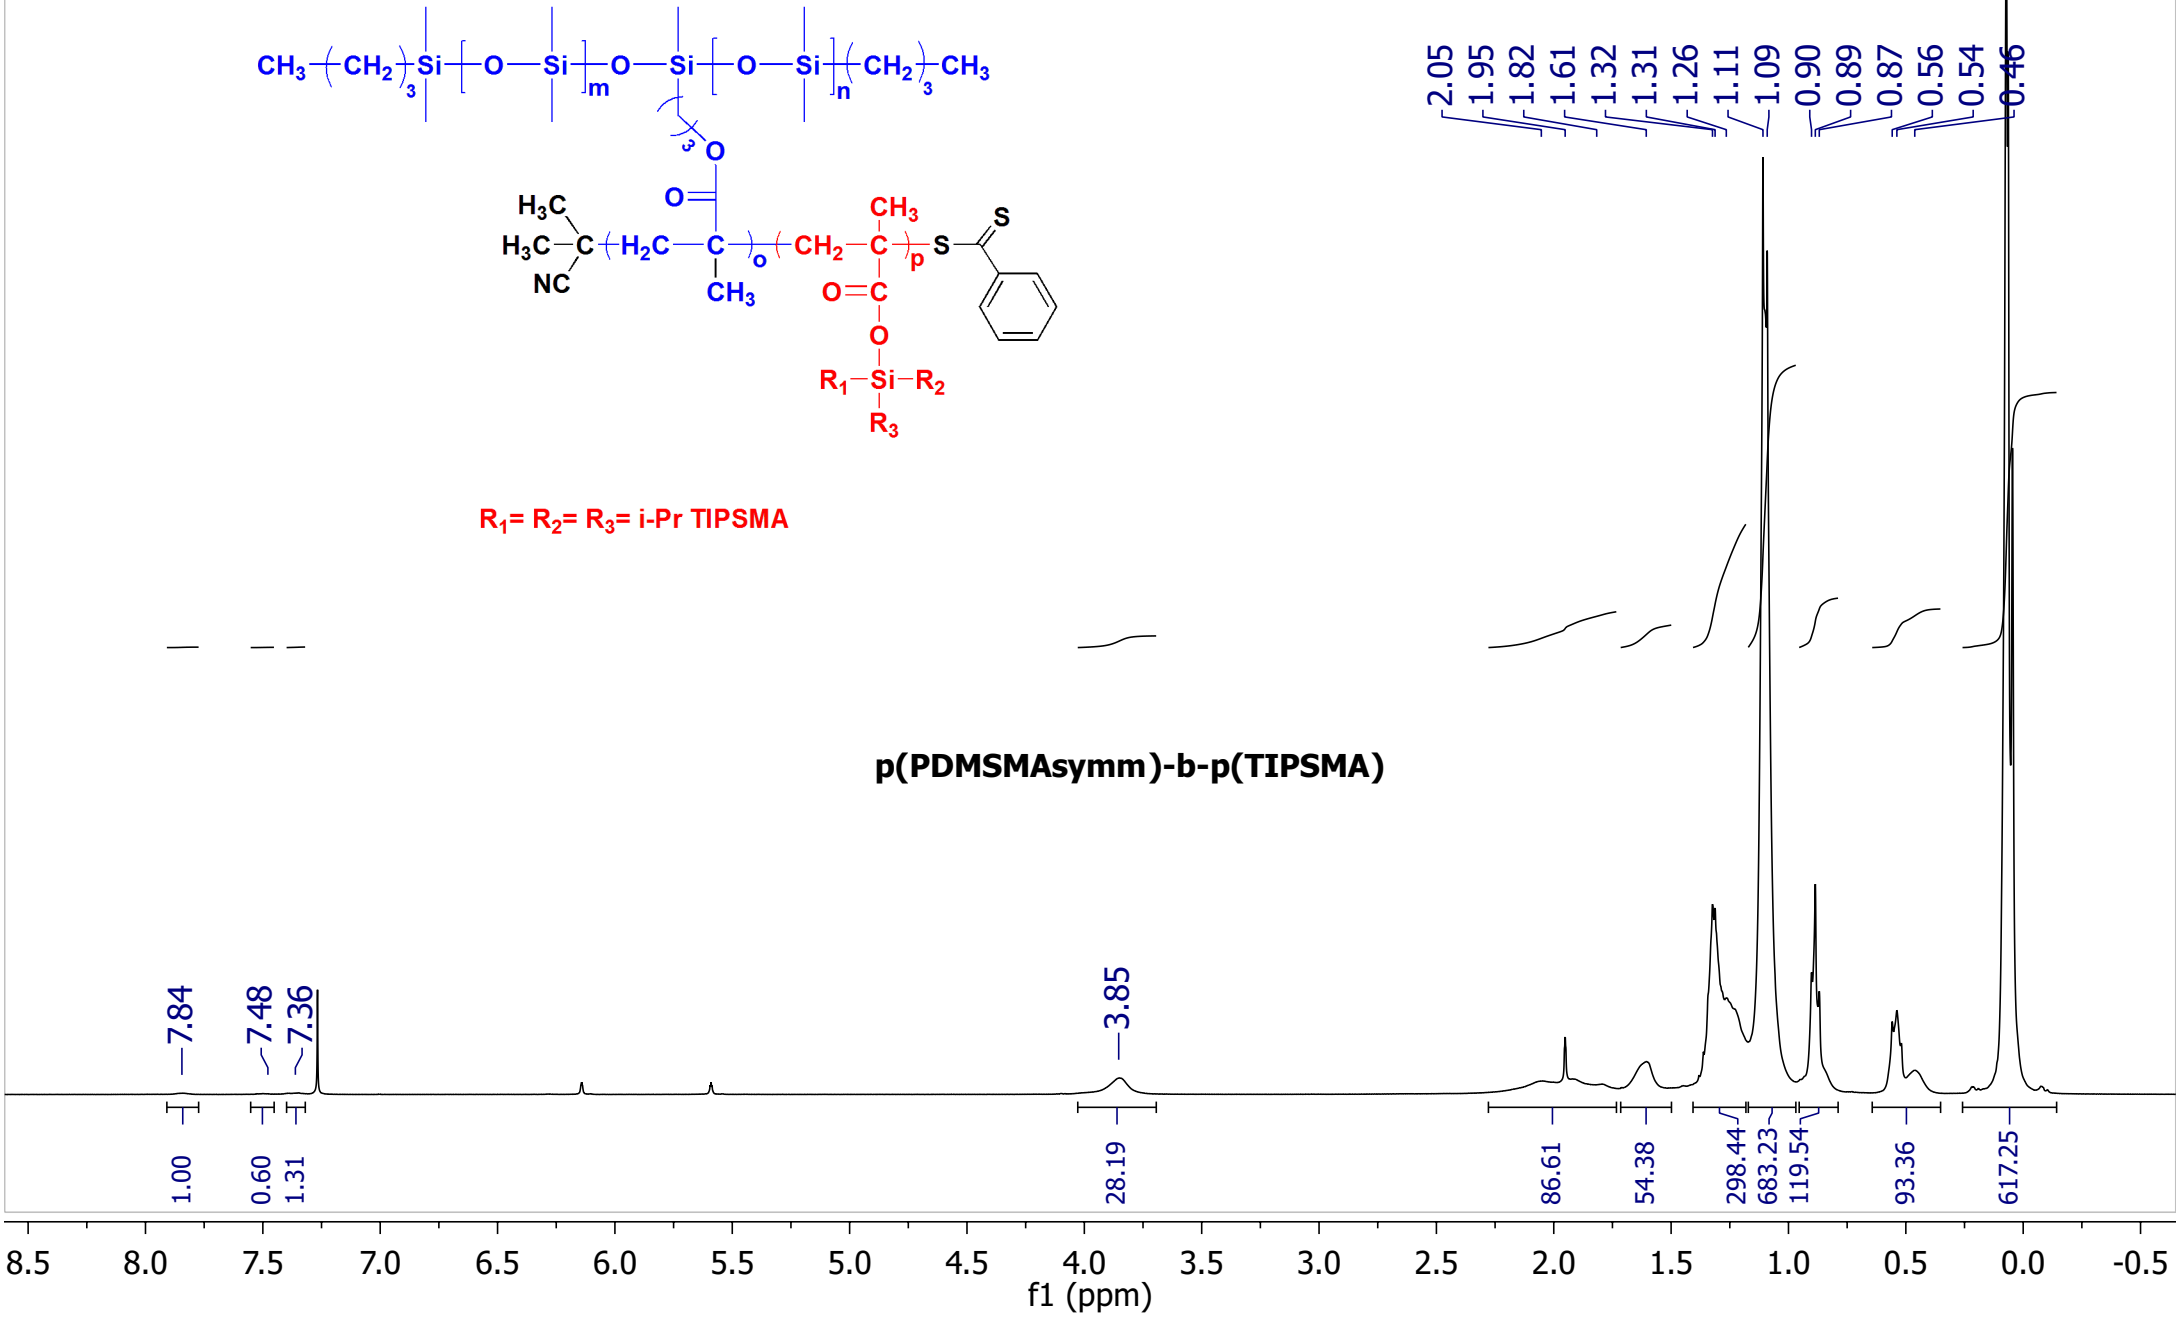

Figure 6.  $^1\text{H}$  NMR spectrum of p(PDMSMAfluor symm)-b-p(TIPSMA) in  $\text{CDCl}_3$

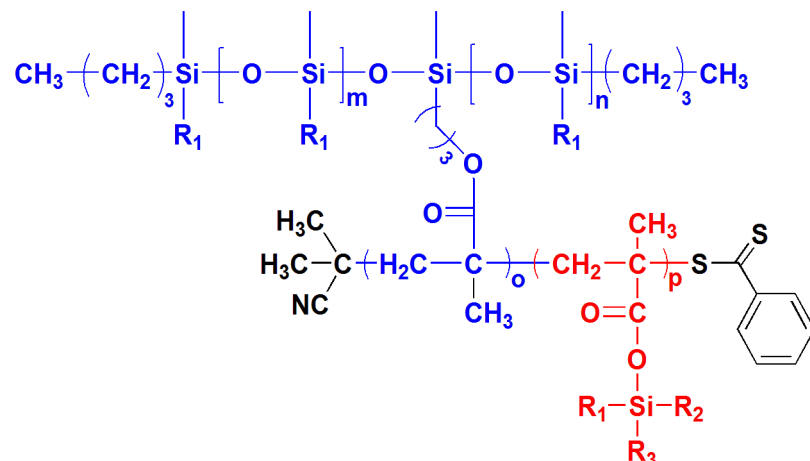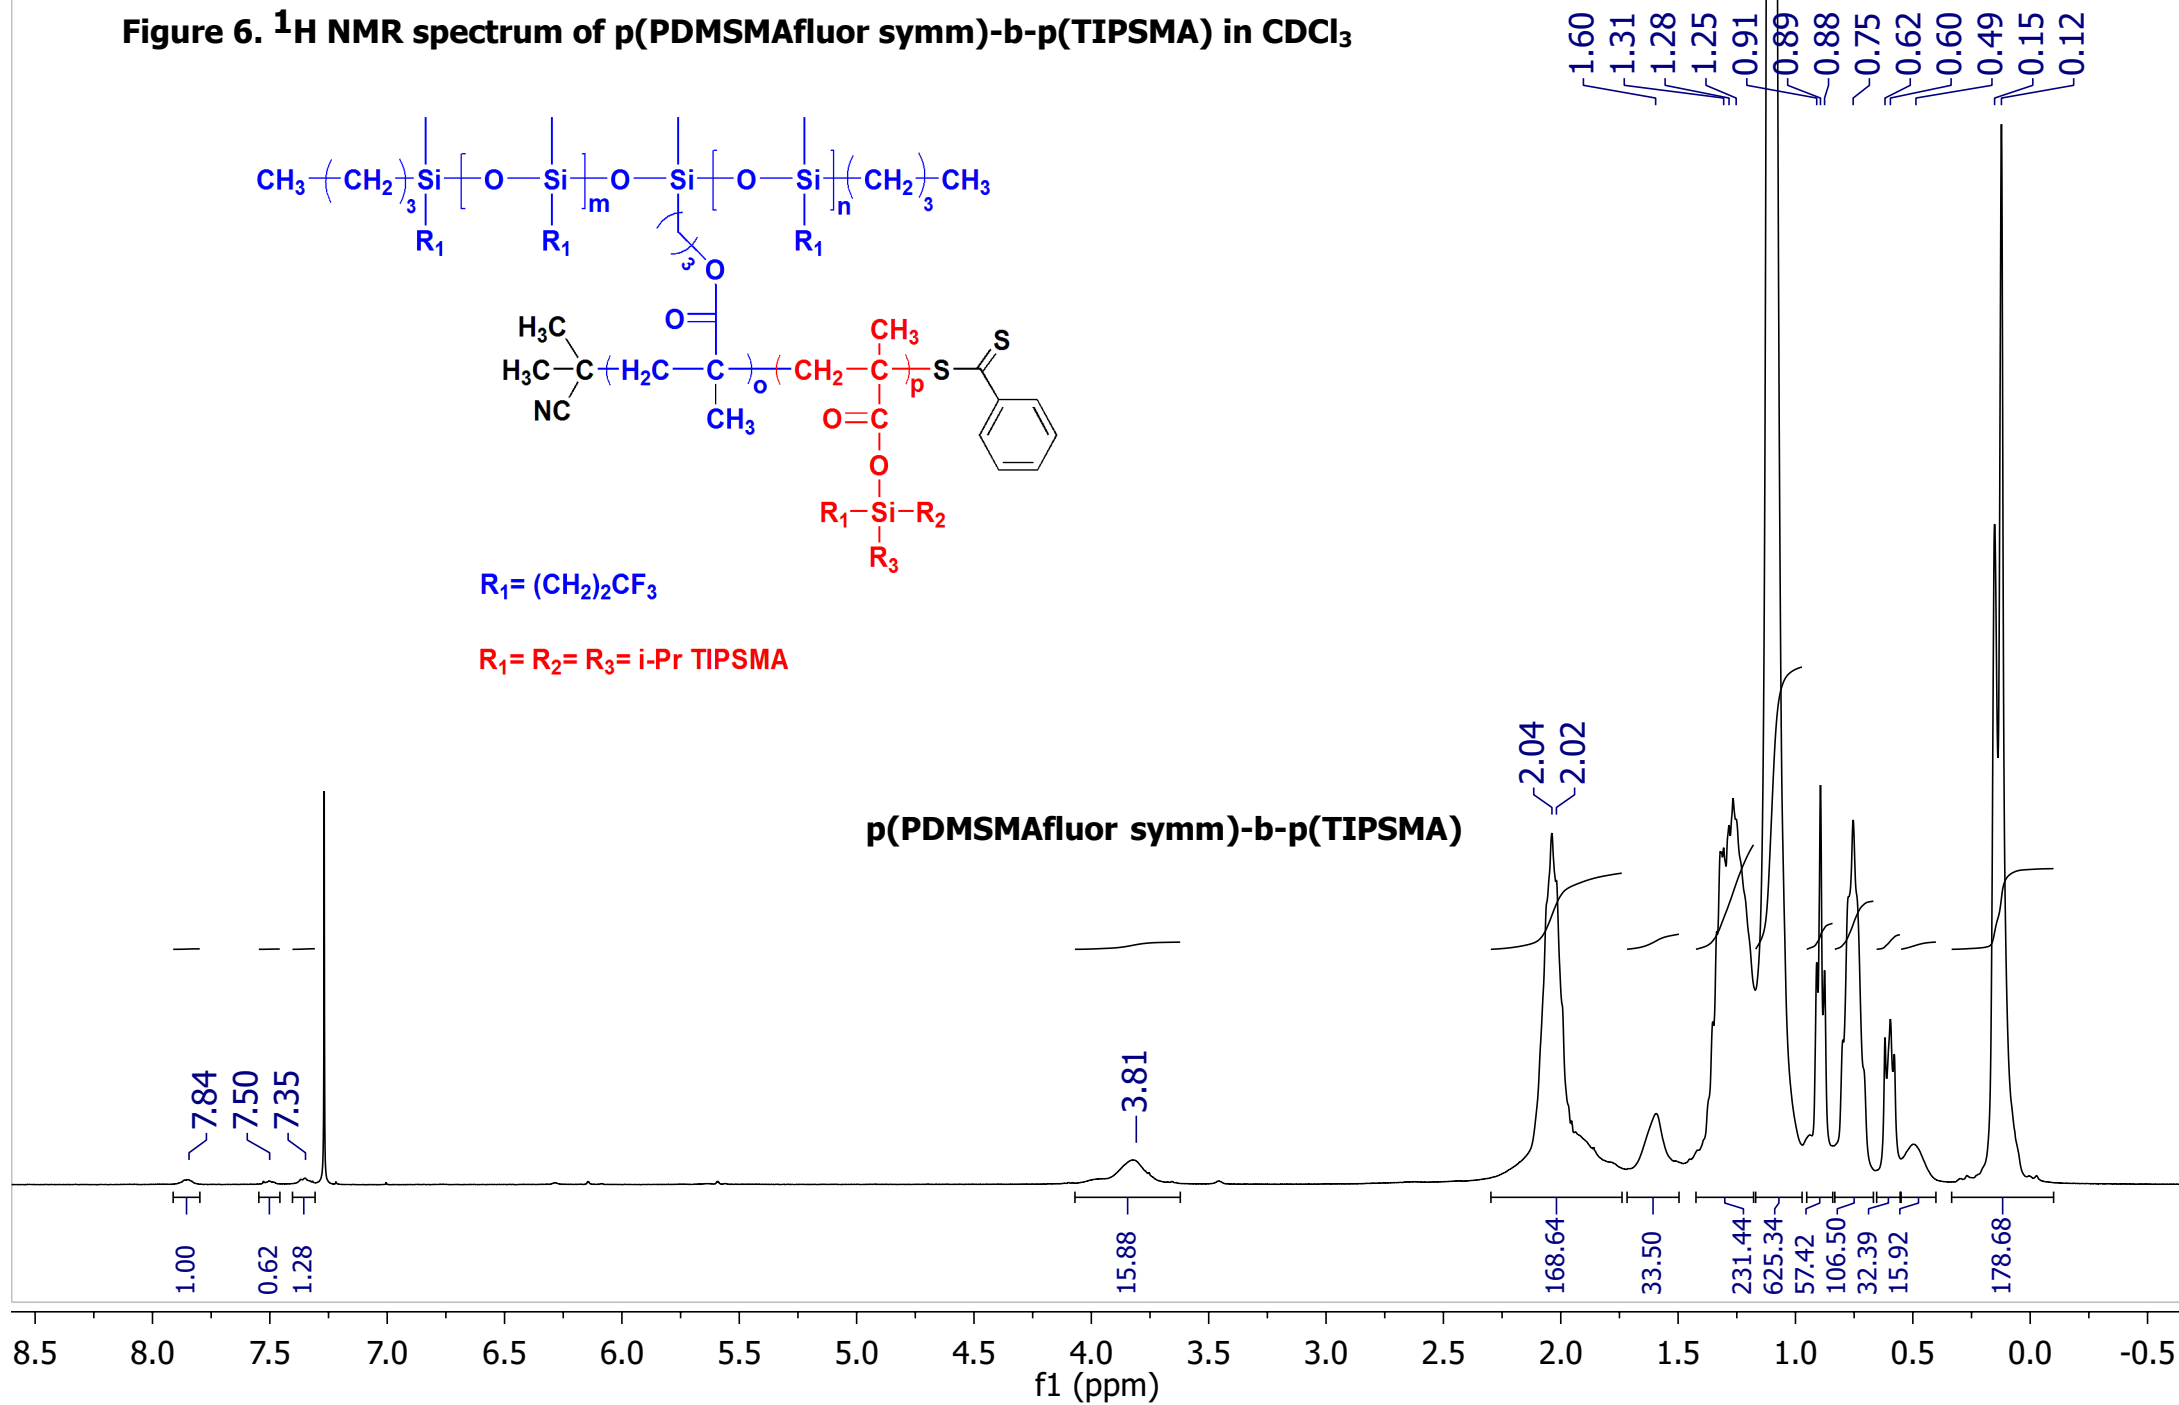



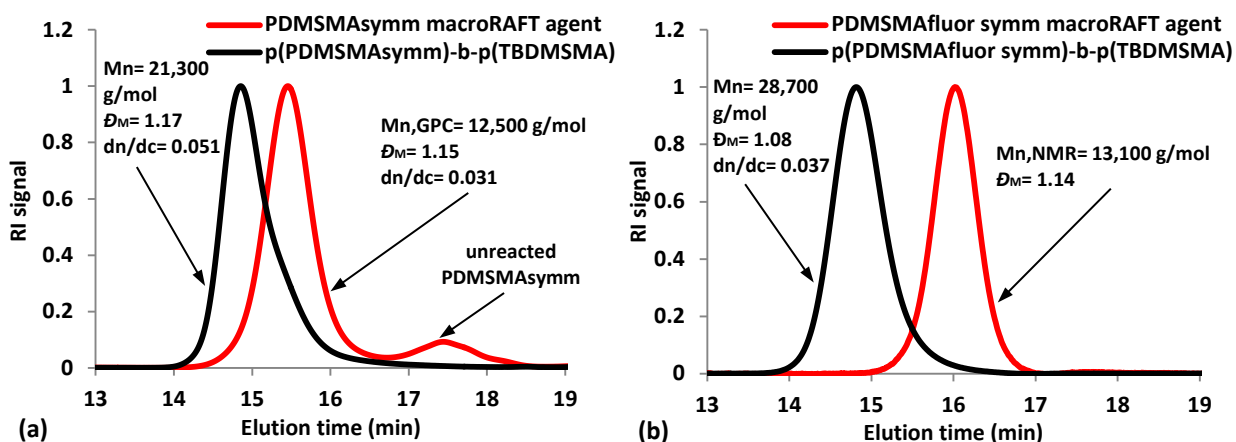

**Figure S7.** (a) TD-SEC traces of PDMSsymm macro RAFT agent ( $M_n = 12\,500$  g/mol and  $\bar{D}_M = 1.15$ ) and p(PDMSAsymm)-b-p(TBDMSMA) block copolymer ( $M_n = 21\,300$  g/mol and  $\bar{D}_M = 1.17$ ) obtained by *in situ* chain extension of macro RAFT agent with TBDMSMA monomer at  $70^\circ\text{C}$  in toluene. For the determination of  $M_{n,TD-SEC}$  crude PDMSsymm macro RAFT agent was used. (b) TD-SEC traces of PDMSfluor symm macro RAFT agent ( $M_{n,NMR} = 13\,100$  g/mol and  $\bar{D}_M = 1.14$ ) and p(PDMSAfluor symm)-b-p(TBDMSMA) block copolymer ( $M_n = 28\,700$  g/mol and  $\bar{D}_M = 1.08$ ) obtained by *in situ* chain extension with TBDMSMA at  $70^\circ\text{C}$  in toluene. For the determination of  $M_{n,NMR}$  precipitated PDMSfluor symm macro RAFT agent was used.

### Determination of global kinetic constants of trialkylsilyl methacrylates and PDMS macromonomers

The global kinetic constants ( $k_g$ ) of polymerization of trialkylsilyl methacrylates and PDMSMA macromonomers were determined using an overall kinetics law of the following form (Equation 1)<sup>1</sup>:

$$V_p = -\frac{d[M]}{dt} = k_p \times [M] \times [P_n] \quad (1)$$

where  $k_p$  is the propagation rate constant,  $[M]$  is the monomer molar concentrations, and  $[P_n]$  is the radical concentration in the reaction media. In the quasi-stationary state, characterized by a constant concentration of radical species in the reaction medium, the amount of the initiated radicals is equal to the amount of the terminated radicals as shown in Equation 2:

$$2 \times f \times k_d \times [A] = 2 \times k_t \times [P_n] \times [P_n] \quad (2)$$

where  $k_d$  is the rate constant of decomposition of the initiator (initiation rate constant),  $f$  is the efficiency of the initiator,  $[A]$  and  $[A_0]$  are the initial and instantaneous concentrations of the initiator, and  $k_t$  is the termination rate constant. Therefore, it follows:

$$[P_n] = \sqrt[2]{(f \times k_d \times [A])/k_t} = \sqrt[2]{(f \times k_d \times [A_0] \times e^{-k_d t})/k_t} \quad (3)$$

By substituting Equation (3) in Equation (1), it follows:

$$V_p = -\frac{d[M]}{dt} = k_p \times [M] \times \sqrt[2]{f \times k_d \times [A_0] \times e^{-k_d t}/k_t} \quad (4)$$

If the initiator concentration is considered constant, the integration of the Equation (4) gives:

$$\ln \frac{[M_0]}{[M]} = k_p \times \sqrt[2]{f \times k_d \times [A_0]/k_t} \quad (5)$$

The values of global rate constants of RAFT polymerization ( $k_g = k_p \times \sqrt[2]{f \times k_d/k_t}$ ) were therefore calculated from the slope of the each straight line in Figure S8.

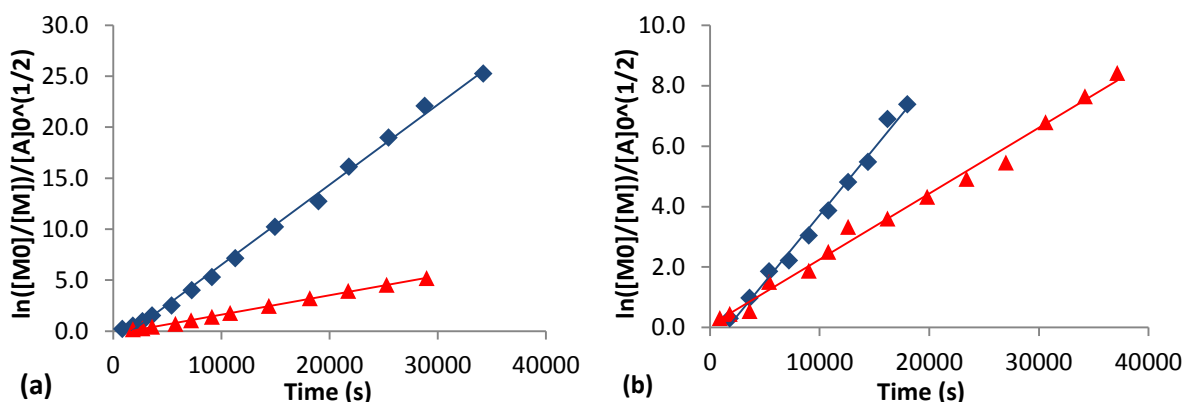

**Figure S8.** (a) Plots of  $\ln([M_0]/[M])/[A]_0^{1/2}$  versus polymerization time for TBDMSMA ( $\blacklozenge$ ) and TIPSMA ( $\blacktriangle$ ) polymerization in toluene at 70°C ([CPDB]/[AIBN]= 5/1):  $k_g(\text{TBDMSMA})= 8.0 \times 10^{-4} \text{ L mol}^{-1/2} \text{ s}^{-1}$  ( $R^2= 0.997$ );  $k_g(\text{TIPSMA})= 2.0 \times 10^{-4} \text{ L mol}^{-1/2} \text{ s}^{-1}$  ( $R^2= 0.999$ ). (b) Plots of  $\ln([M_0]/[M])/[A]_0^{1/2}$  versus polymerization time for symmetrical PDMSMA ( $\blacklozenge$ ), and fluorinated symmetrical PDMSMA ( $\blacktriangle$ ) polymerization in toluene at 70°C ([CPDB]/[AIBN]= 2/1):  $k_g(\text{PDMSMA symm})= 4.0 \times 10^{-4} \text{ L mol}^{-1/2} \text{ s}^{-1}$  ( $R^2= 0.991$ );  $k_g(\text{PDMSMA fluor symm})= 2.0 \times 10^{-4} \text{ L mol}^{-1/2} \text{ s}^{-1}$  ( $R^2= 0.991$ ).

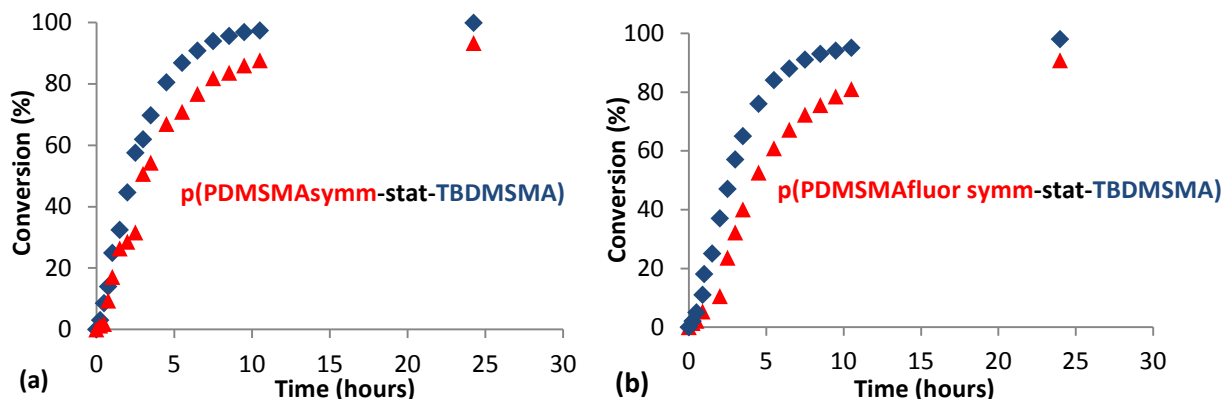

**Figure S9.** (a) Plot of monomer conversion versus time for RAFT copolymerization of TBDMSMA ( $\blacklozenge$ ) and symmetrical PDMSMA macromonomer (PDMSMA<sub>symm</sub>,  $\blacktriangle$ ), in the presence of CPDB at 70°C in toluene. (b) Plot of monomer conversion *versus* time for RAFT copolymerization of TBDMSMA ( $\blacklozenge$ ) and symmetrical fluorinated PDMSMA macromonomer (PDMSMA<sub>fluor symm</sub>,  $\blacktriangle$ ), in the presence of CPDB at 70°C in toluene.

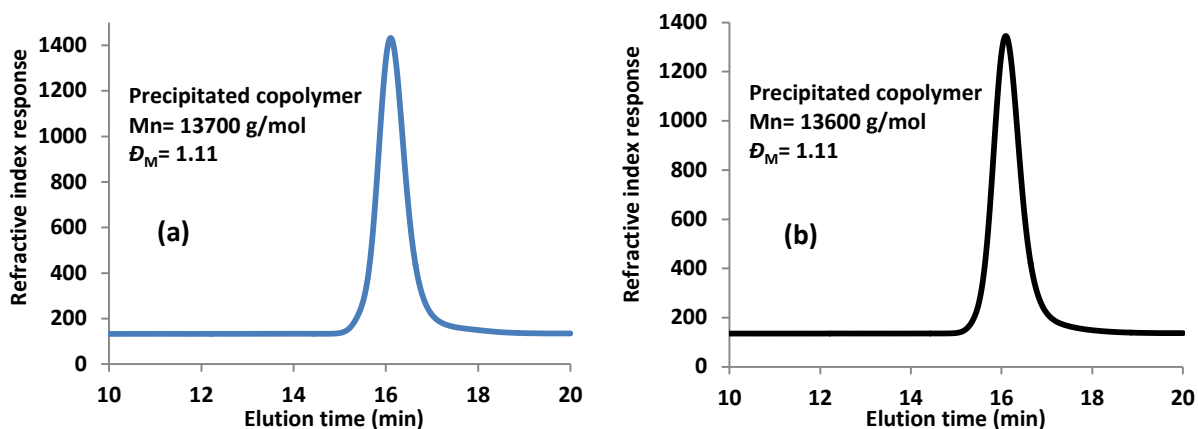

**Figure S10.** TD-SEC traces of statistical copolymers obtained by CPDB-mediated RAFT copolymerization of TBDMSMA and either PDMS<sub>symm</sub> or PDMSMA<sub>fluor symm</sub> macromonomers at 70°C in toluene. (a) p(PDMSMA<sub>symm</sub>-stat-TBDMSMA) (Mn= 13 700 g/mol and Đ<sub>M</sub>= 1.11). (b) p(PDMSMA<sub>fluor symm</sub>-stat-TBDMSMA) (Mn= 13 600 g/mol and Đ<sub>M</sub>= 1.11).

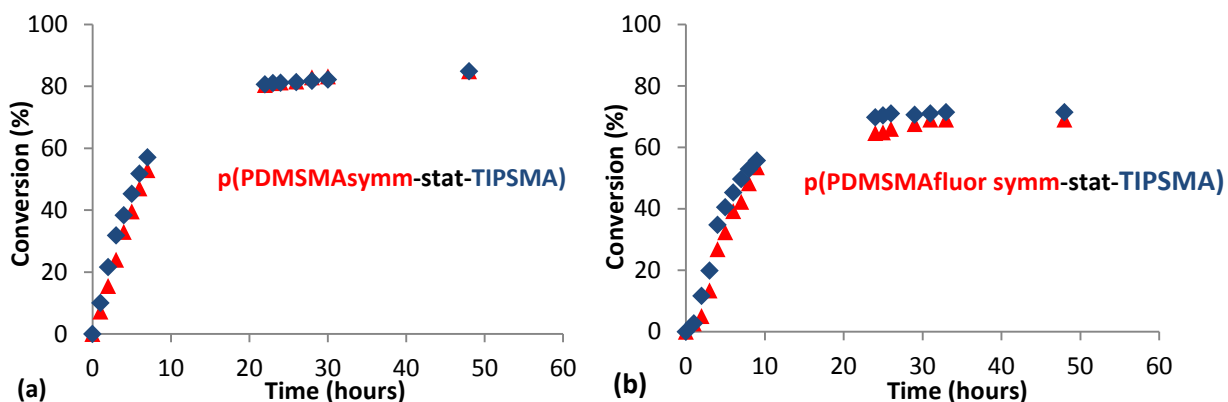

**Figure S11.** (a) Plot of monomer conversion *versus* time for RAFT copolymerization of TIPSMA ( $\blacklozenge$ ) and symmetrical PDMSMA macromonomer ( $\blacktriangle$ ) (PDMSMA<sub>symm</sub>), in the presence of CPDB at 70°C in toluene. (b) Plot of monomer conversion *versus* time for RAFT copolymerization of TIPSMA ( $\blacklozenge$ ) and symmetrical fluorinated PDMSMA macromonomer (PDMSMA<sub>fluor symm</sub>, ( $\blacktriangle$ )), in the presence of CPDB at 70°C in toluene.

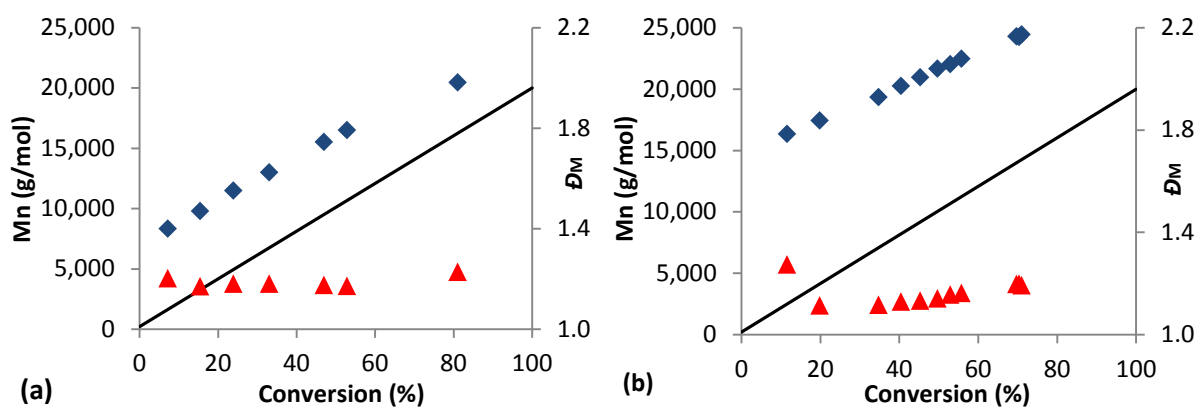

**Figure S12.** Evolution of the number-average molar mass  $M_n$  ( $\blacklozenge$ ) and dispersity  $D_M$  ( $\blacktriangle$ ) with monomer conversion in the statistical copolymerization of TIPSMA and either PDMSMA<sub>symm</sub> (a) or PDMSMA<sub>fluor symm</sub> (b) at 70°C mediated by CPDB.

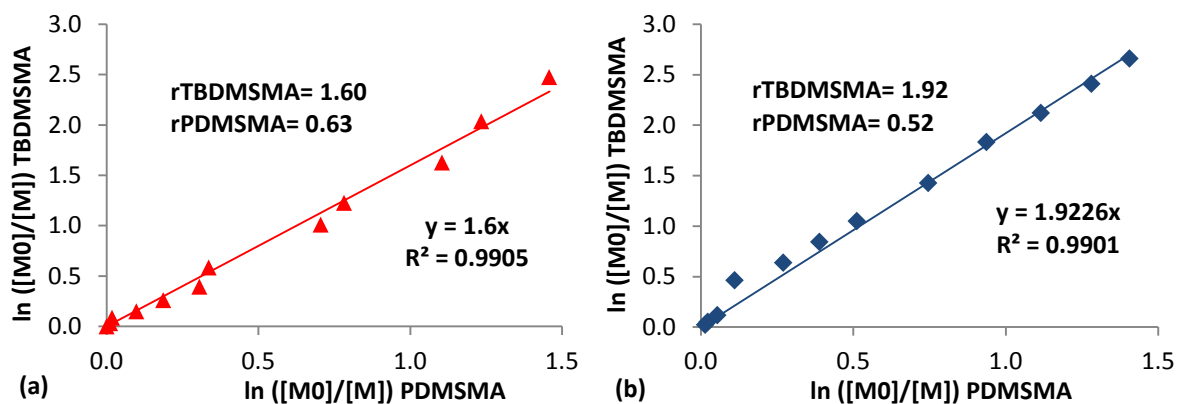

**Figure S13.** Jaacks plot for the RAFT polymerization of TBDMSMA and PDMSMA<sub>symm</sub> (a), and PDMSMA<sub>fluor symm</sub> (b) in toluene at 70°C.

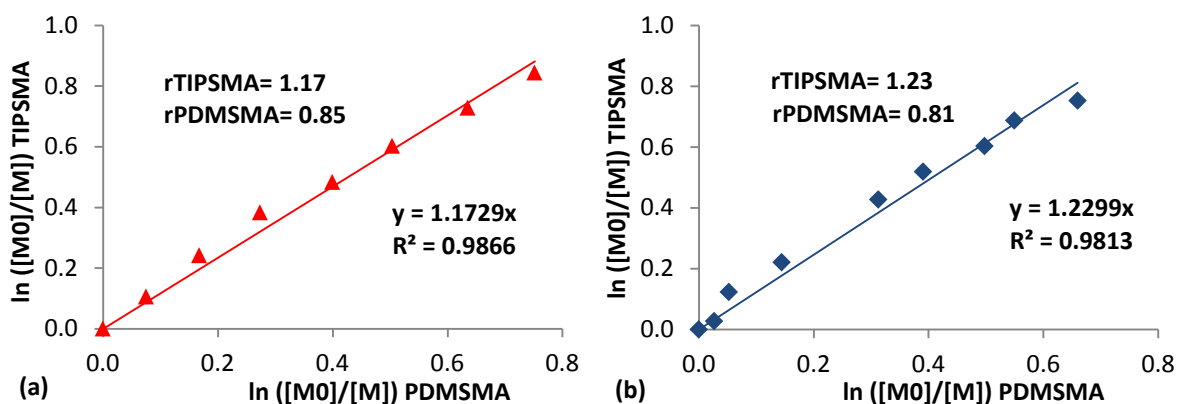

**Figure S14.** Jaacks plot for the RAFT polymerization of TIPSMA and PDMSMA<sub>symm</sub> (a), and PDMSMA<sub>fluor symm</sub> (b) in toluene at 70°C.

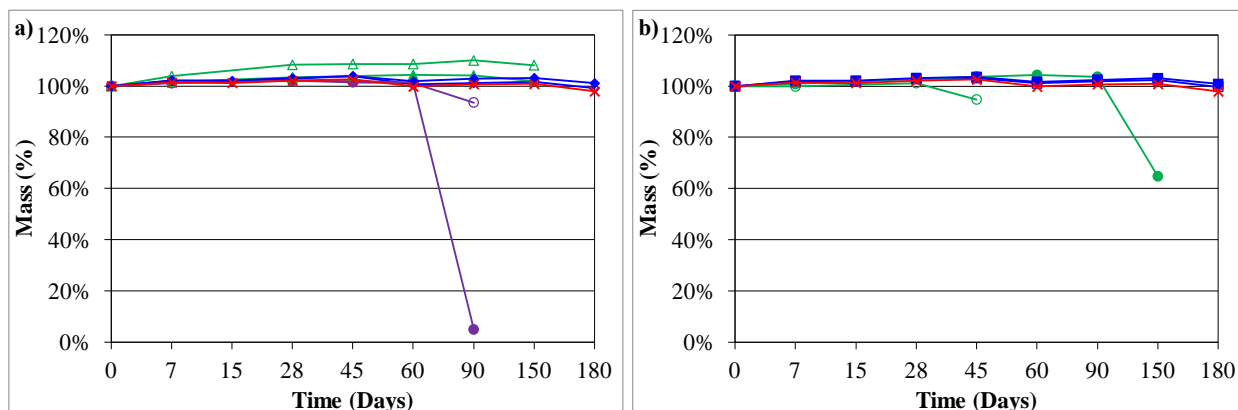

**Figure S15.** Evolution of the mass with immersion time in artificial seawater. **(a)** Coatings composed of statistical graft copolymers ( $\diamond$ ) p(PDMSMA<sub>asymm-stat-TIPSMA</sub>) 50/50, ( $\blacklozenge$ ) p(PDMSMA<sub>fluor symm-stat-TIPSMA</sub>) 50/50, ( $\circ$ ) p(PDMSMA<sub>asymm-stat-TBDMSMA</sub>) 20/80, ( $\bullet$ ) p(PDMSMA<sub>fluor symm-stat-TBDMSMA</sub>) 20/80, ( $\triangle$ ) p(PDMSMA<sub>asymm-stat-TBDMSMA</sub>) 50/50, ( $\blacktriangle$ ) p(PDMSMA<sub>fluor symm-stat-TBDMSMA</sub>) 50/50 **(b)** coatings composed of diblock graft copolymers ( $\square$ ) p(PDMSMA<sub>asymm</sub>)-b-pTIPSMA 50/50, ( $\blacksquare$ ) p(PDMSMA<sub>fluor symm</sub>)-b-pTIPSMA 50/50, ( $\circ$ ) p(PDMSMA<sub>asymm</sub>)-b-pTBDMSMA 50/50, ( $\bullet$ ) p(PDMSMA<sub>fluor symm</sub>)-b-pTBDMSMA 50/50. The film-forming hydrolyzable homopolymer pTIPSMA ( $\times$ ) is used as reference.

## References

- 1) Matyjaszewski, K.; Davis, T. P. Handbook of Radical Polymerization; John Wiley & Sons Inc., 2002.
